# Supplementary material for: Quantifying Soft Tissue Shape and Symmetry: Patients with Cleft Lip/Palate and Facial Paralysis
Source: PubMed Central journal article supplement — Plast Reconstr Surg Glob Open. 2018 Mar 20;6(3):e1715. doi: 10.1097/GOX.0000000000001715 (PMC5908516; doi:10.1097/gox.0000000000001715), 2018-03-20
Supplement: gox-6-e1715-s001.pdf [file gox-6-e1715-s001.pdf]

|                  | <b>Control Females</b> |    |     | <b>Control Males</b> |    |     | <b>Patients with CL/P</b> |      |
|------------------|------------------------|----|-----|----------------------|----|-----|---------------------------|------|
| <b>Age Range</b> | F5                     | F8 | F11 | M5                   | M8 | M11 | BL/P                      | UL/P |
| <b>N</b>         | 19                     | 27 | 28  | 17                   | 22 | 25  | 16                        | 23   |

F5 = control females aged 5 to 7 years; M5 = control males aged 5 to 7 years; F8 = control females aged 8 to 10 years; M8 = control males aged 8 to 10 years; F11 = control females aged 11 to 14 years; M11 = control males aged 11 to 14 years; BL/P = bilateral cleft lip and palate (CL/P) patients; and UL/P = unilateral cleft lip and palate (CL/P) patients.
