# Supplementary material for: Quantifying Soft Tissue Shape and Symmetry: Patients with Cleft Lip/Palate and Facial Paralysis
Source: PubMed Central journal article supplement — Plast Reconstr Surg Glob Open. 2018 Mar 20;6(3):e1715. doi: 10.1097/GOX.0000000000001715 (PMC5908516; doi:10.1097/gox.0000000000001715), 2018-03-20
Supplement: gox-6-e1715-s002.pdf [file gox-6-e1715-s002.pdf]

|           | <b>Patients with Repaired Cleft Lip and Palate (CL/P)</b>                                                                                                                                                                                                                                                                                                             | <b>Control Subjects</b>                                                                                                                                                                                                                                                                                              |
|-----------|-----------------------------------------------------------------------------------------------------------------------------------------------------------------------------------------------------------------------------------------------------------------------------------------------------------------------------------------------------------------------|----------------------------------------------------------------------------------------------------------------------------------------------------------------------------------------------------------------------------------------------------------------------------------------------------------------------|
| Inclusion | <p>Repaired complete unilateral or bilateral CL/P</p> <p>Patient interest / parent willingness to participate in the study</p> <p>An ability to comprehend verbal instructions</p> <p>An age range of 5-21 yrs.</p>                                                                                                                                                   | <p>Patient interest / parent willingness to participate in the study</p> <p>An ability to comprehend verbal instructions</p> <p>An age range of 5 to 21 years.</p>                                                                                                                                                   |
| Exclusion | <p>Previous lip-revision surgery within two years to ensure complete healing</p> <p>Previous facial soft-tissue surgery other than lip revision</p> <p>Previous orthognathic/reconstructive surgery</p> <p>A diagnosis of a craniofacial anomaly other than CL/P</p> <p>A medical history of diabetes, collagen vascular disease, systemic neurologic impairment.</p> | <p>A medical history of diabetes, collagen vascular disease, systemic neurologic impairment</p> <p>Mental or hearing impairment to the extent that comprehension or ability to perform tests is hampered</p> <p>Posterior tooth loss that results in a loss of lower anterior height and mandibular overclosure.</p> |
