# Supplementary material for: Quantifying Soft Tissue Shape and Symmetry: Patients with Cleft Lip/Palate and Facial Paralysis
Source: PubMed Central journal article supplement — Plast Reconstr Surg Glob Open. 2018 Mar 20;6(3):e1715. doi: 10.1097/GOX.0000000000001715 (PMC5908516; doi:10.1097/gox.0000000000001715), 2018-03-20
Supplement: gox-6-e1715-s003.pdf [file gox-6-e1715-s003.pdf]

|           | <b>Patients with Facial Paralysis (FP)</b>                                                                                                                                                                                                                                                                                                                                                              | <b>Control Subjects</b>                                                                                                                                                                                        |
|-----------|---------------------------------------------------------------------------------------------------------------------------------------------------------------------------------------------------------------------------------------------------------------------------------------------------------------------------------------------------------------------------------------------------------|----------------------------------------------------------------------------------------------------------------------------------------------------------------------------------------------------------------|
| Inclusion | <p>A diagnosis of virally triggered, acute, unilateral, flaccid facial paralysis (Bell's Palsy) presenting within 14 days of onset and with an estimated potential for recovery between 6-12 weeks</p> <p>Patient interest/willingness to participate in the study</p> <p>An ability to comprehend verbal instructions</p> <p>An age range of 18 to 68 years.</p>                                       | <p>Subject interest/willingness to participate in the study</p> <p>An ability to comprehend verbal instructions</p> <p>An age range of 18 to 68 years.</p>                                                     |
| Exclusion | <p>Facial movement disorders due to primary muscular dysfunction or hemifacial spasm in the absence of synkinesis</p> <p>Complaints of facial paralysis but no evidence of weakness on physical examination</p> <p>Previous facial soft tissue surgery and/or orthognathic surgery</p> <p>Mental or hearing impairment to the extent that comprehension or ability to perform the tests is hampered</p> | <p>Facial soft tissue surgery, orthognathic surgery, and /or facial soft tissue disorder</p> <p>Mental or hearing impairment to the extent that comprehension or ability to perform the tests is hampered.</p> |
