# Supplementary figures and images for: Quantifying Soft Tissue Shape and Symmetry: Patients with Cleft Lip/Palate and Facial Paralysis
Source: PubMed Central journal article supplement — Plast Reconstr Surg Glob Open. 2018 Mar 20;6(3):e1715. doi: 10.1097/GOX.0000000000001715 (PMC5908516; doi:10.1097/gox.0000000000001715), 2018-03-20

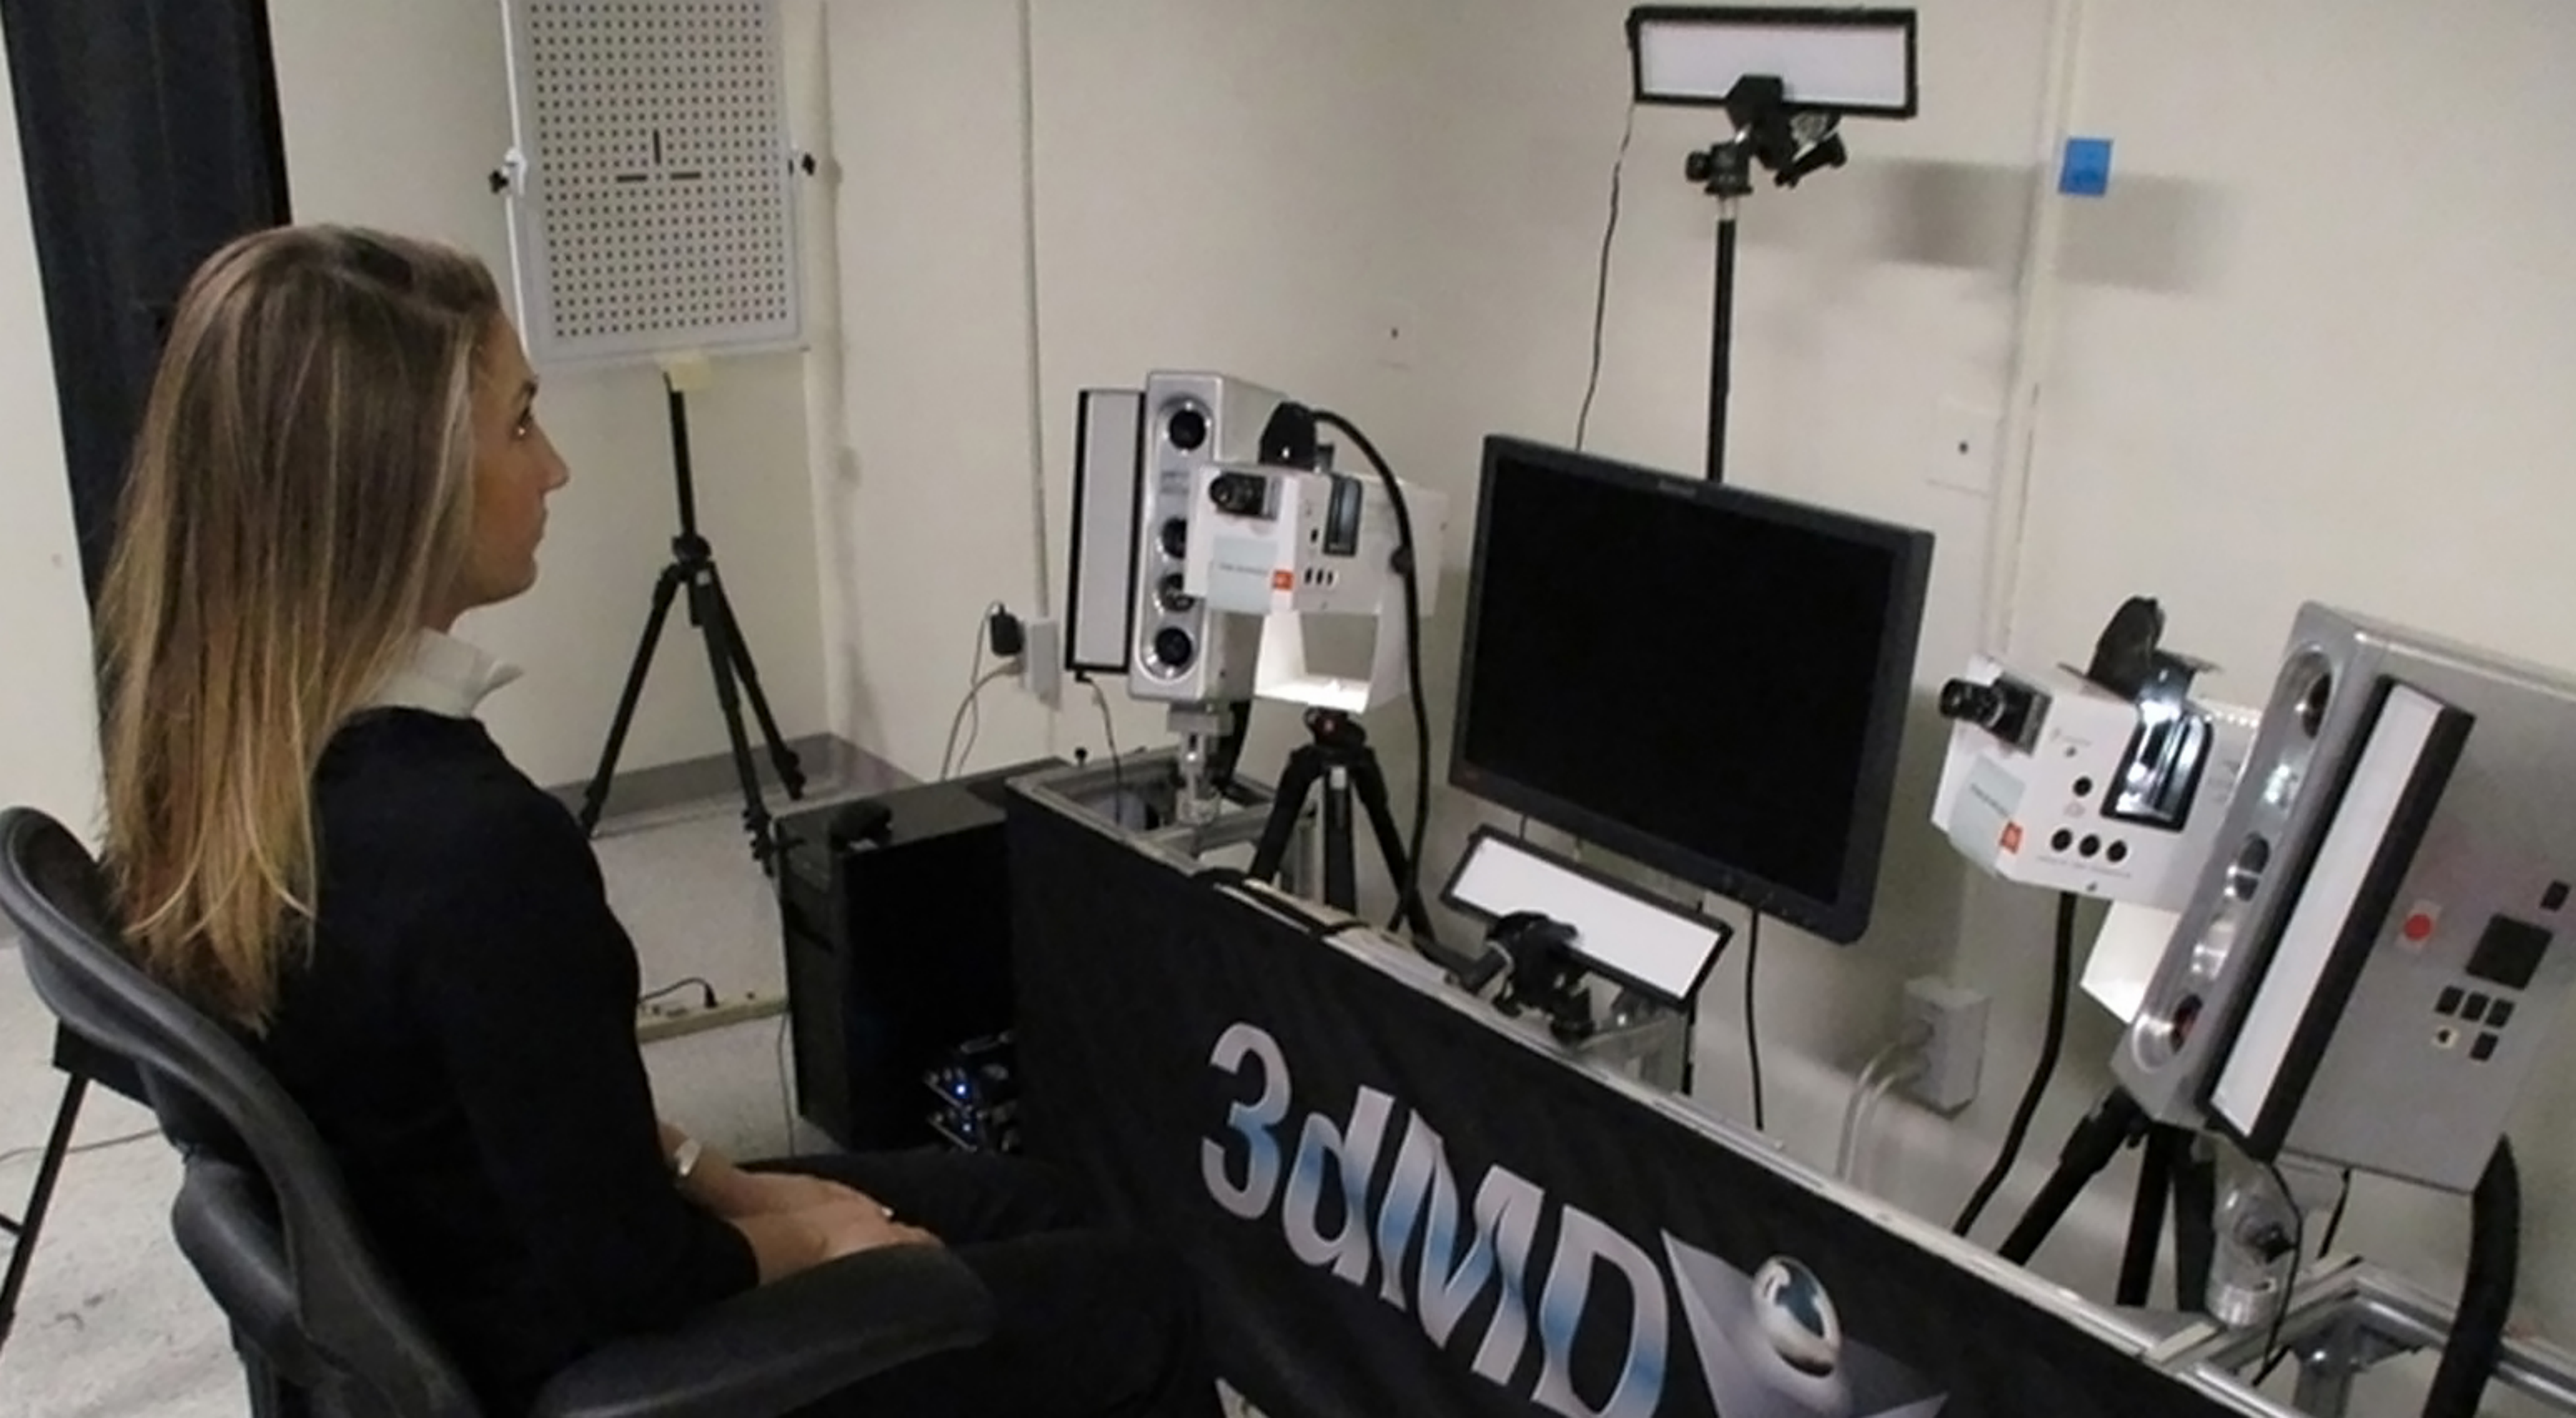

Supplement: gox-6-e1715-s004.pdf [file gox-6-e1715-s004.pdf]

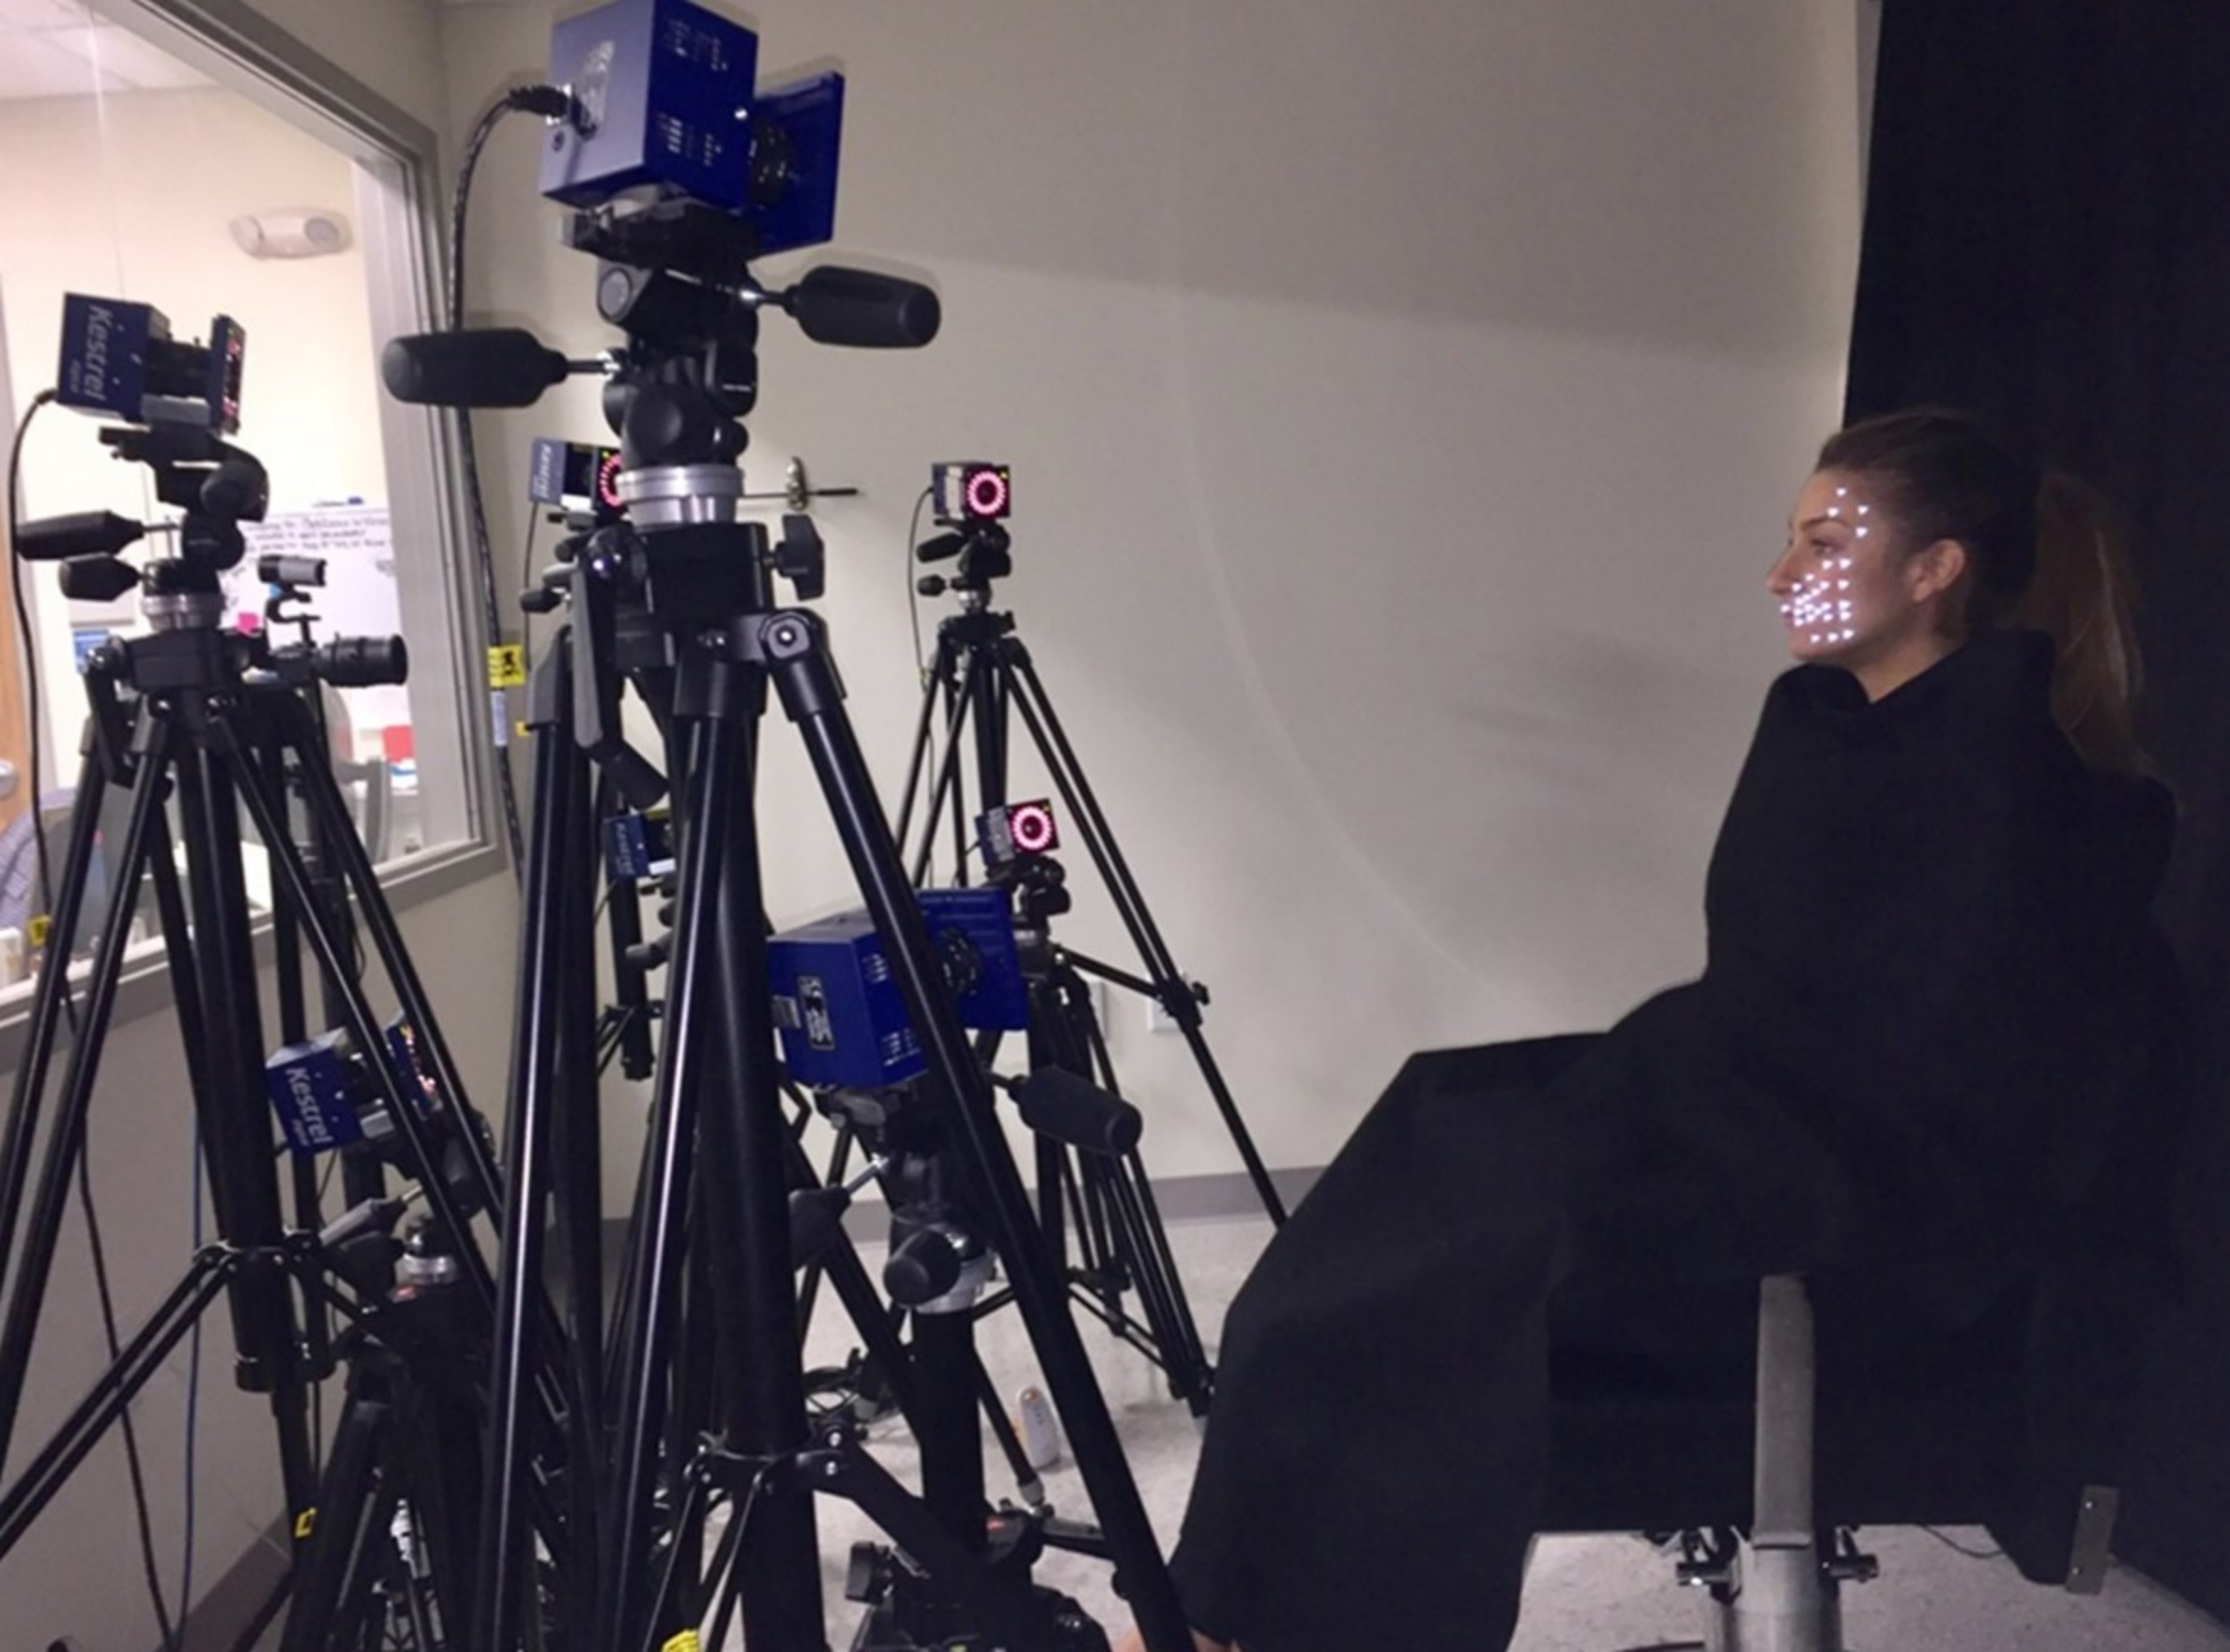

Supplement: gox-6-e1715-s005.pdf [file gox-6-e1715-s005.pdf]

Scores on lower lip

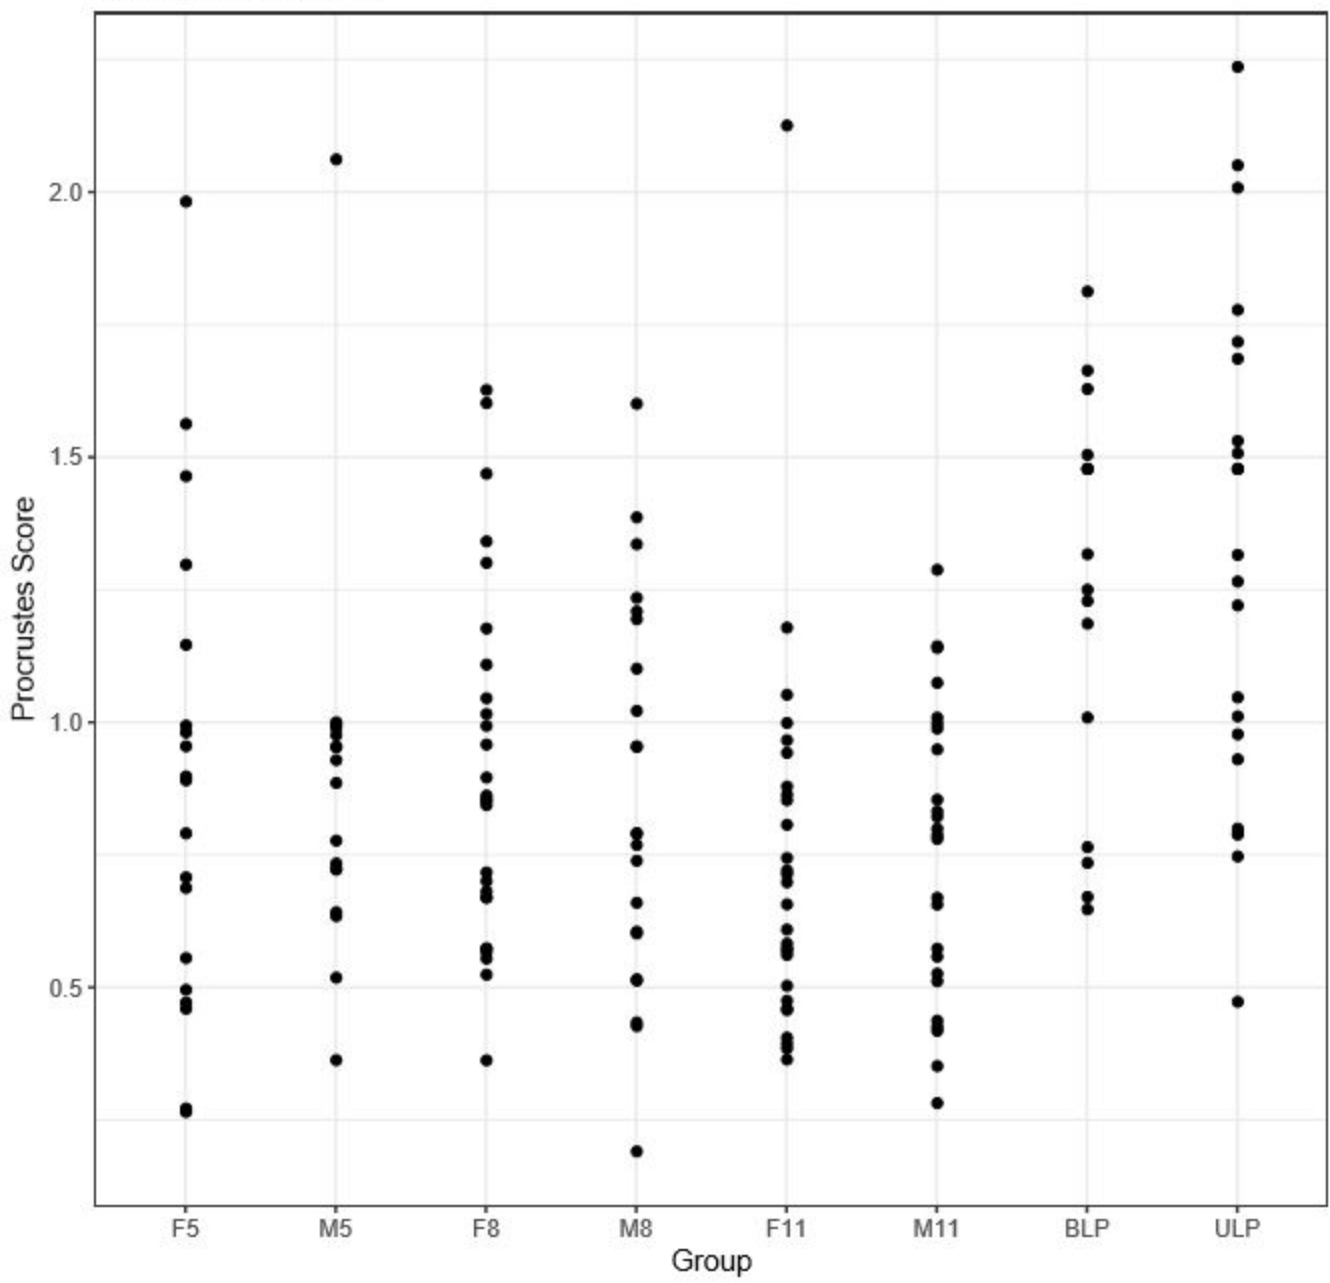

Supplement: gox-6-e1715-s006.pdf [file gox-6-e1715-s006.pdf]

Midline asymmetry scores

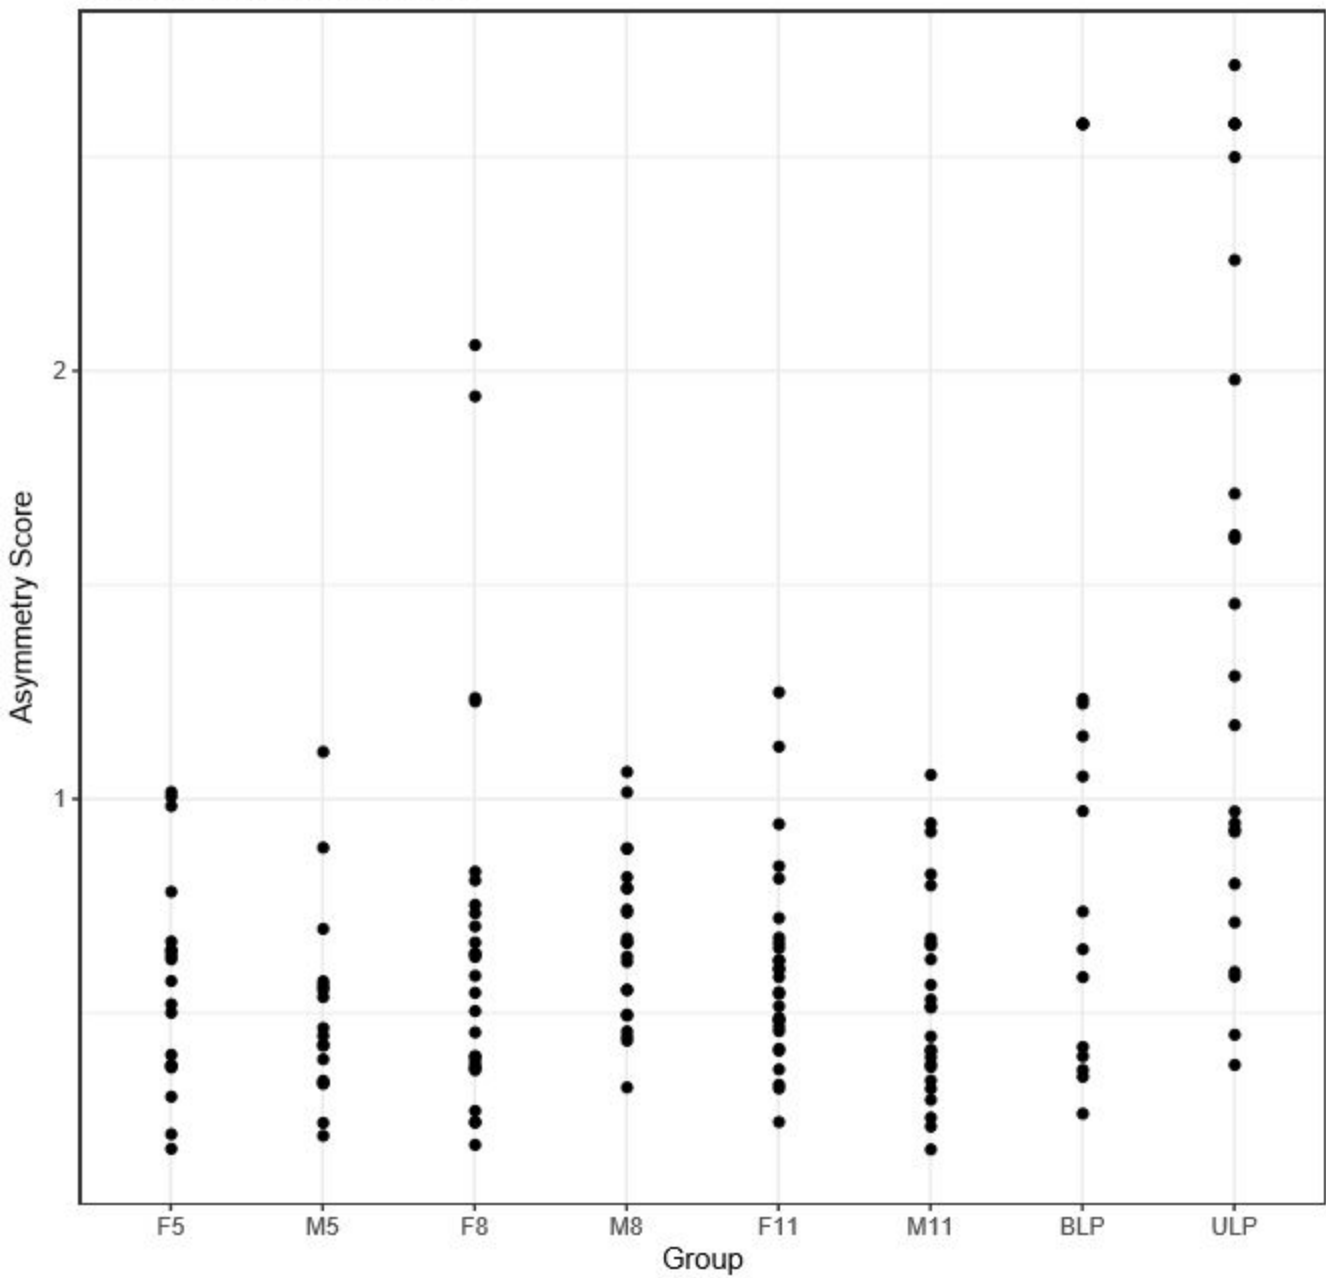

Supplement: gox-6-e1715-s007.pdf [file gox-6-e1715-s007.pdf]

# Midline asymmetry scores

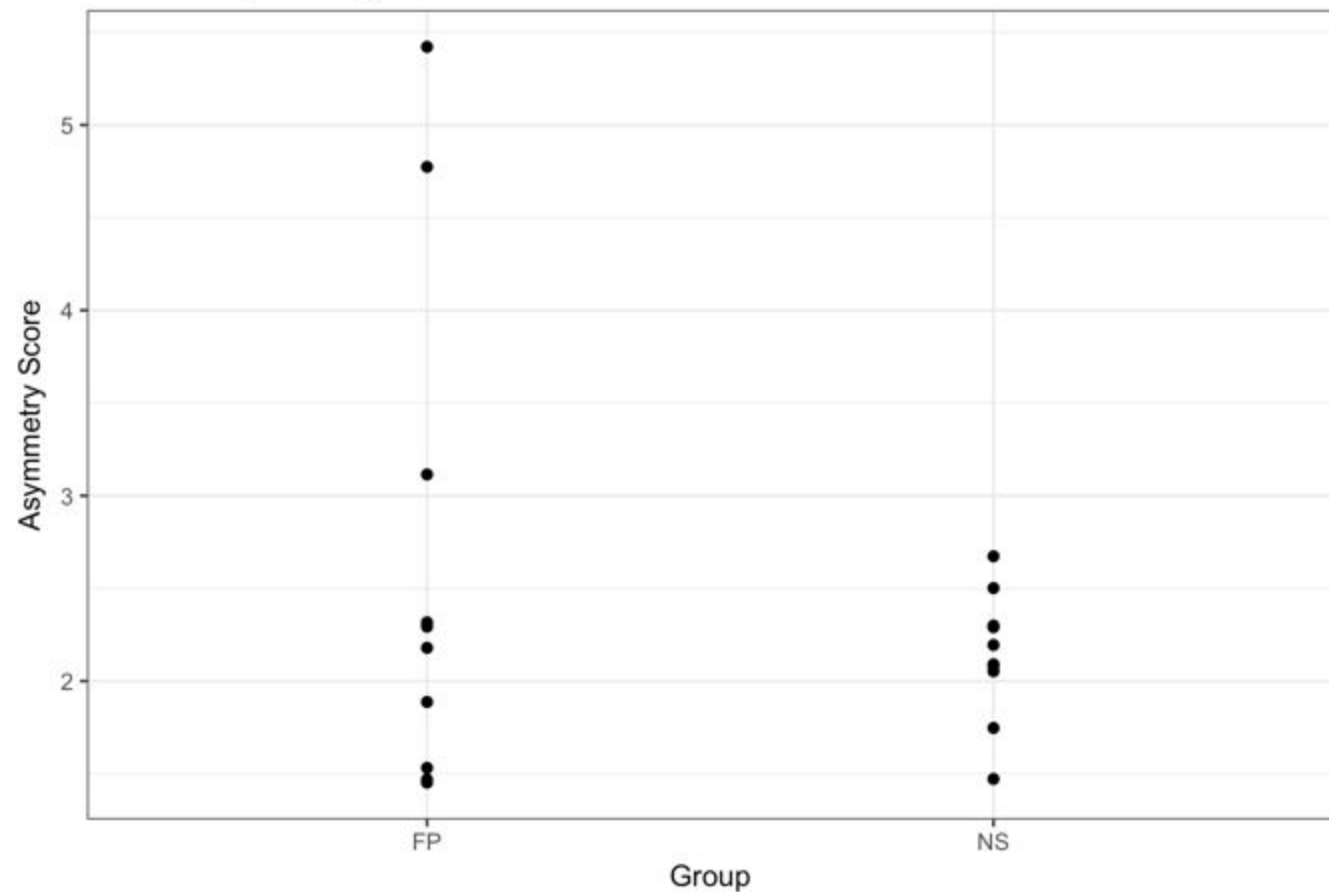

Supplement: gox-6-e1715-s008.pdf [file gox-6-e1715-s008.pdf]
